# Supplementary material for: Effects of conventional therapeutic interventions on the number and function of regulatory T cells
Source: PubMed Central journal article supplement — Oncoimmunology. 2013 Nov 1;2(10):e27025. doi: 10.4161/onci.27025 (PMC3862634; doi:10.4161/onci.27025), 2013-11-01
Supplement: onci-2-e27025-s01.pdf [file onci-2-e27025-s01.pdf]

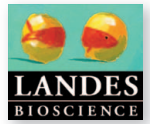

## **Supplemental Material to:**

**Mario Roselli, Vittore Cereda, Maria Giovanna di Bari,  
Vincenzo Formica, Antonella Spila, Caroline Jochems,  
Benedetto Farsaci, Renee Donahue, James L Gulley, Jeffrey  
Schlom, Fiorella Guadagni**

**Effects of conventional therapeutic interventions  
on the number and function of regulatory T cells**

**Oncolmunology 2013; 2(10)**

**<http://dx.doi.org/10.4161/onci.26440>**

**[http://www.landesbioscience.com/journals/oncoimmunology/  
article/26440/](http://www.landesbioscience.com/journals/oncoimmunology/article/26440/)**

**Supplemental Table 1A. Immune Cell Subsets**

| <b>Immune cell</b>                                     | <b>Meaning</b>                                                                                   |
|--------------------------------------------------------|--------------------------------------------------------------------------------------------------|
| <b>ALC</b>                                             | Absolute lymphocyte count                                                                        |
| <b>CD4</b>                                             | T helper cells                                                                                   |
| CD4 <sub>CM</sub>                                      | Central memory T helper cells (CD45RA <sup>NEG</sup> CD62L <sup>+</sup> CCR7 <sup>+</sup> )      |
| PD-1 <sup>+</sup> TIM-3 <sup>NEG</sup>                 | Activated central memory CD4 T cells, negative immune regulator                                  |
| CD4 <sub>CM</sub>                                      |                                                                                                  |
| PD-1 <sup>NEG</sup> TIM-3 <sup>+</sup>                 | Activated central memory CD4 T cells, negative immune regulator                                  |
| CD4 <sub>CM</sub>                                      |                                                                                                  |
| PD-1 <sup>+</sup> TIM-3 <sup>+</sup> CD4 <sub>CM</sub> | Severe exhaustion of central memory CD4 T cells                                                  |
| CD4 <sub>EM</sub>                                      | Effector memory T helper cells (CD45RA <sup>NEG</sup> CD62L <sup>NEG</sup> CCR7 <sup>NEG</sup> ) |
| PD-1 <sup>+</sup> TIM-3 <sup>NEG</sup>                 | Activated effector memory CD4 T cells, negative immune regulator                                 |
| CD4 <sub>EM</sub>                                      |                                                                                                  |
| PD-1 <sup>NEG</sup> TIM-3 <sup>+</sup>                 | Exhausted effector memory CD4 T cells, negative immune regulator                                 |
| CD4 <sub>EM</sub>                                      |                                                                                                  |
| PD-1 <sup>+</sup> TIM-3 <sup>+</sup> CD4 <sub>EM</sub> | Severe exhaustion of effector memory CD4 T cells                                                 |
| ICOS <sup>+</sup> CD4                                  | Activated T helper cells                                                                         |
| IFN $\gamma$ <sup>+</sup> CD4                          | Activated T helper cells                                                                         |
| T <sub>H</sub> 17                                      | T helper cell type 17, unclear role in cancer                                                    |
| IFN $\gamma$ <sup>+</sup> T <sub>H</sub> 17            | More activated T helper cell type 17                                                             |
| <b>CD8</b>                                             | Cytotoxic T cells                                                                                |
| PD-1 <sup>NEG</sup> TIM-3 <sup>+</sup> CD8             | Activated CD8 T cells, negative immune regulator                                                 |
| CD8 <sub>CM</sub>                                      | Central memory cytotoxic T cells (CD45RA <sup>NEG</sup> CD62L <sup>+</sup> CCR7 <sup>+</sup> )   |
| PD-1 <sup>+</sup> TIM-3 <sup>NEG</sup>                 | Activated central memory CD8 T cells, negative immune regulator                                  |
| CD8 <sub>CM</sub>                                      |                                                                                                  |
| PD-1 <sup>NEG</sup> TIM-3 <sup>+</sup>                 | Activated central memory CD8 T cells, negative immune regulator                                  |
| CD8 <sub>CM</sub>                                      |                                                                                                  |
| PD-1 <sup>+</sup> TIM-3 <sup>+</sup> CD8 <sub>CM</sub> | Severe exhaustion of central memory cytotoxic T cells                                            |
| CD8 <sub>EM</sub>                                      | Effector memory CD8 T cells (CD45RA <sup>NEG</sup> CD62L <sup>NEG</sup> CCR7 <sup>NEG</sup> )    |
| PD-1 <sup>+</sup> TIM-3 <sup>NEG</sup>                 | Activated effector memory CD8 T cells, negative immune regulator                                 |
| CD8 <sub>EM</sub>                                      |                                                                                                  |
| PD-1 <sup>NEG</sup> TIM-3 <sup>+</sup>                 | Activated effector memory CD8 T cells, negative immune regulator                                 |
| CD8 <sub>EM</sub>                                      |                                                                                                  |
| PD-1 <sup>+</sup> TIM-3 <sup>+</sup> CD8 <sub>EM</sub> | Severe exhaustion of effector memory cytotoxic T cells                                           |
| ICOS <sup>+</sup> CD8                                  | Activated cytotoxic T cells                                                                      |

**Supplemental Table 1B. Immune Cell Subsets**

| <b>Immune cell</b>                     | <b>Meaning</b>                                                                                                                                                                           |
|----------------------------------------|------------------------------------------------------------------------------------------------------------------------------------------------------------------------------------------|
| <b>TREGS</b>                           | Regulatory T cells (CD4 <sup>+</sup> CD25 <sup>HI</sup> CD127 <sup>NEG</sup> )                                                                                                           |
| CD4 : TREG RATIO                       | Ratio of effector T cells to regulatory T cells                                                                                                                                          |
| CD8 : TREG RATIO                       | Ratio of effector T cells to regulatory T cells                                                                                                                                          |
| <b>NK CELLS</b>                        | Natural killer cells                                                                                                                                                                     |
| CD16 <sup>+</sup> CD56 <sup>BR</sup>   | Functional intermediate, lytic and cytokine production                                                                                                                                   |
| TIM-3 <sup>+</sup>                     | Fully functional intermediate                                                                                                                                                            |
| CD16 <sup>+</sup> CD56 <sup>BR</sup>   |                                                                                                                                                                                          |
| CD16 <sup>+</sup> CD56 <sup>DIM</sup>  | Mature, more cytokine production                                                                                                                                                         |
| TIM-3 <sup>+</sup>                     | Fully functional mature                                                                                                                                                                  |
| CD16 <sup>+</sup> CD56 <sup>DIM</sup>  |                                                                                                                                                                                          |
| CD16 <sup>NEG</sup> CD56 <sup>BR</sup> | Immature, more lytic                                                                                                                                                                     |
| TIM-3 <sup>+</sup>                     | Immature NK cells transitioning into more mature                                                                                                                                         |
| CD16 <sup>NEG</sup> CD56 <sup>BR</sup> | (CD16 <sup>+</sup> CD56 <sup>DIM</sup> ) phenotype                                                                                                                                       |
| <b>MDSC</b>                            | Myeloid derived suppressor cells (HLA-DR <sup>NEG</sup> CD33 <sup>+</sup> CD11b <sup>+</sup> )                                                                                           |
| MDSC <sub>MO</sub>                     | Monocytic MDSC (CD14 <sup>+</sup> CD15 <sup>NEG</sup> )                                                                                                                                  |
| MDSC <sub>GR</sub>                     | Granulocytic MDSC (CD14 <sup>NEG</sup> CD15 <sup>+</sup> )                                                                                                                               |
| MDSC <sub>LIN-</sub>                   | Non-lineage MDSC (CD14 <sup>NEG</sup> CD15 <sup>NEG</sup> )                                                                                                                              |
| <b>MARKERS</b>                         |                                                                                                                                                                                          |
| CTLA-4                                 | Cytotoxic T lymphocyte-associated antigen-4                                                                                                                                              |
| ICOS                                   | Inducible co-stimulator<br>Co-stimulatory for the activation of T cells.                                                                                                                 |
| PD-1                                   | Programmed death 1 receptor<br>On activated T cells and B cells, and on mature dendritic cells.<br>Negative immune regulator, engagement with PD-L1 can down regulate T cell activation. |
| TIM-3                                  | T cell immunoglobulin and mucin domain-containing molecule-3<br>Activation and maturation marker, and negative regulator of NK cells. Negative immune regulator expressed on T cells.    |
